# Supplementary material
Source: HighWire-hosted journal article supplement (https://erj.ersjournals.com/content/54/1/1802442)
Supplement: inline-supplementary-material-1 [file inline-supplementary-material-1.pdf]

Figure S1: Imbalances between groups, before and after matching, measured by standardized mean differences (SMD)

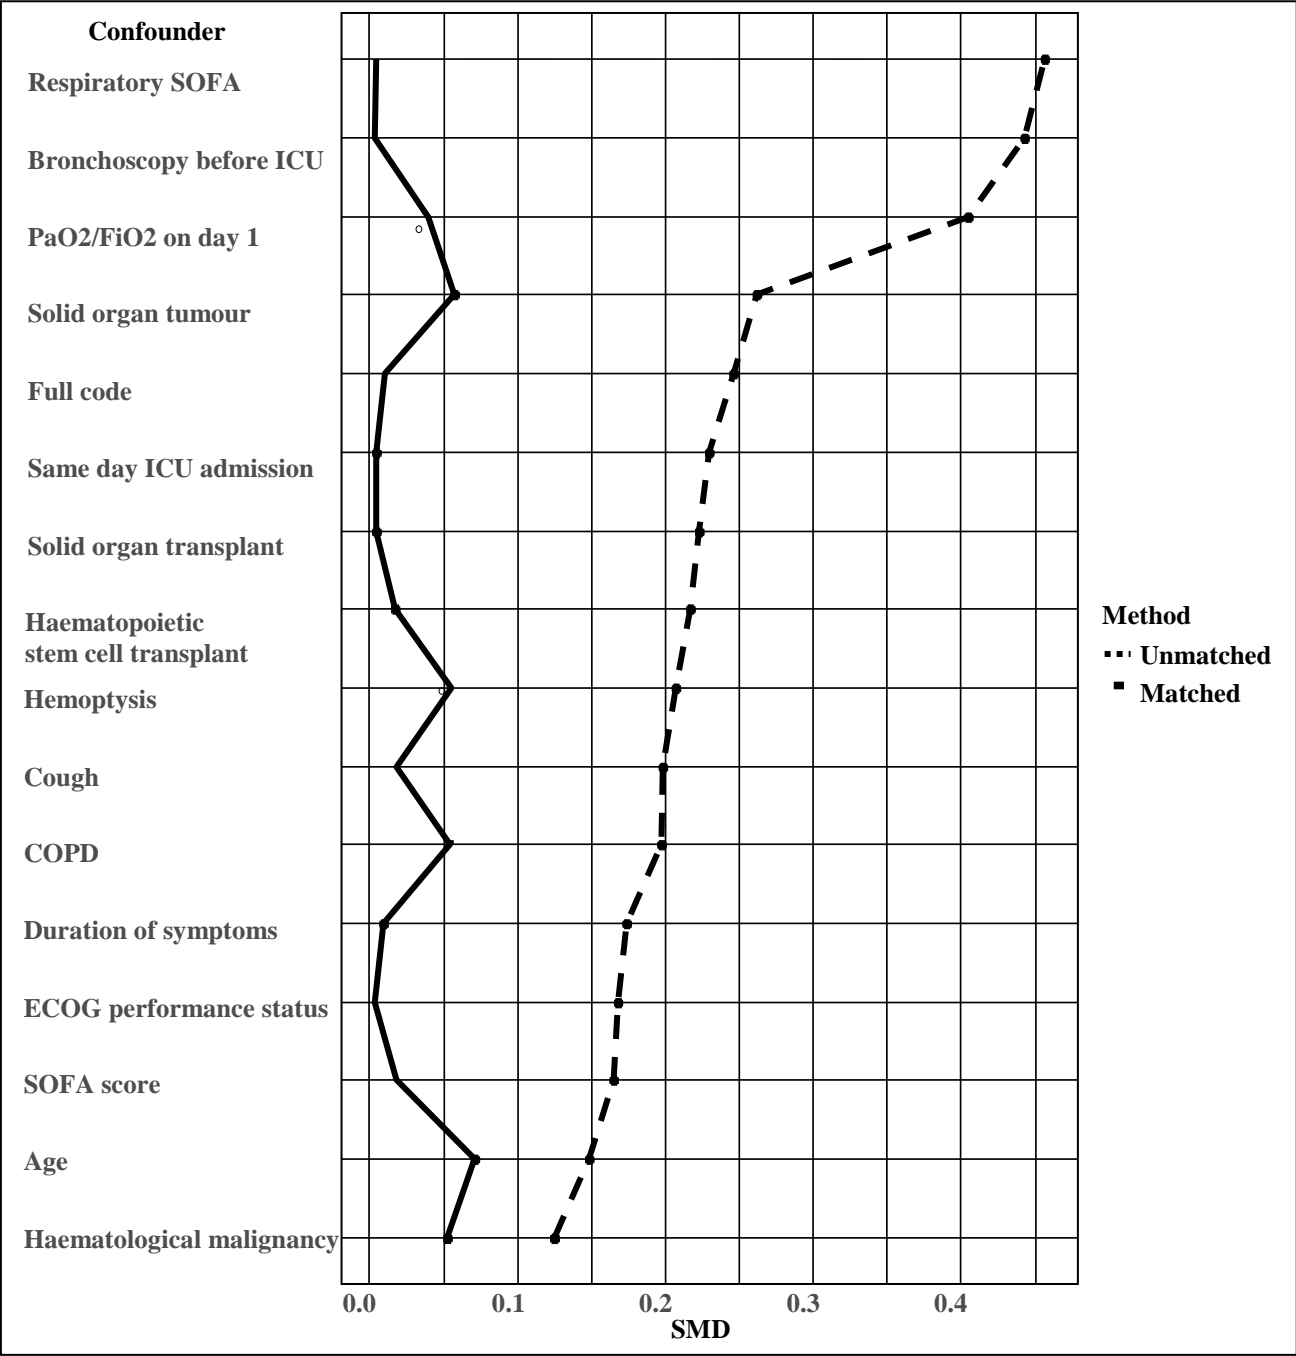

Figure S2: Distribution of the final propensity score overall and according to diagnostic group (n=494 in each group, AUC =0.498)

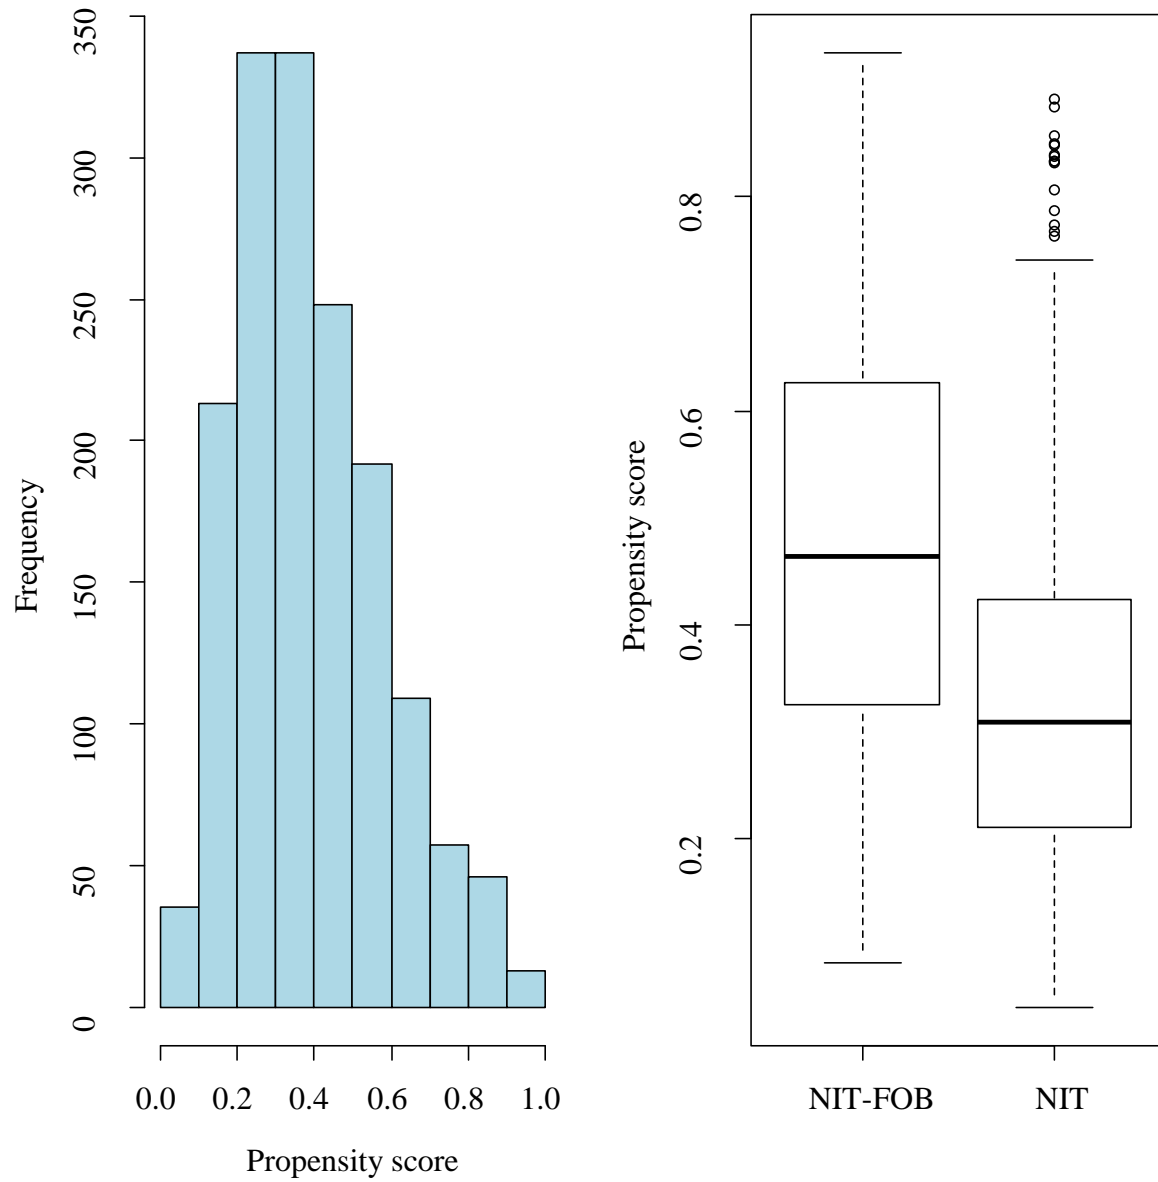

Figure S3: Hospital mortality and intubation rate by centre and expected accuracy in estimates according to centre size

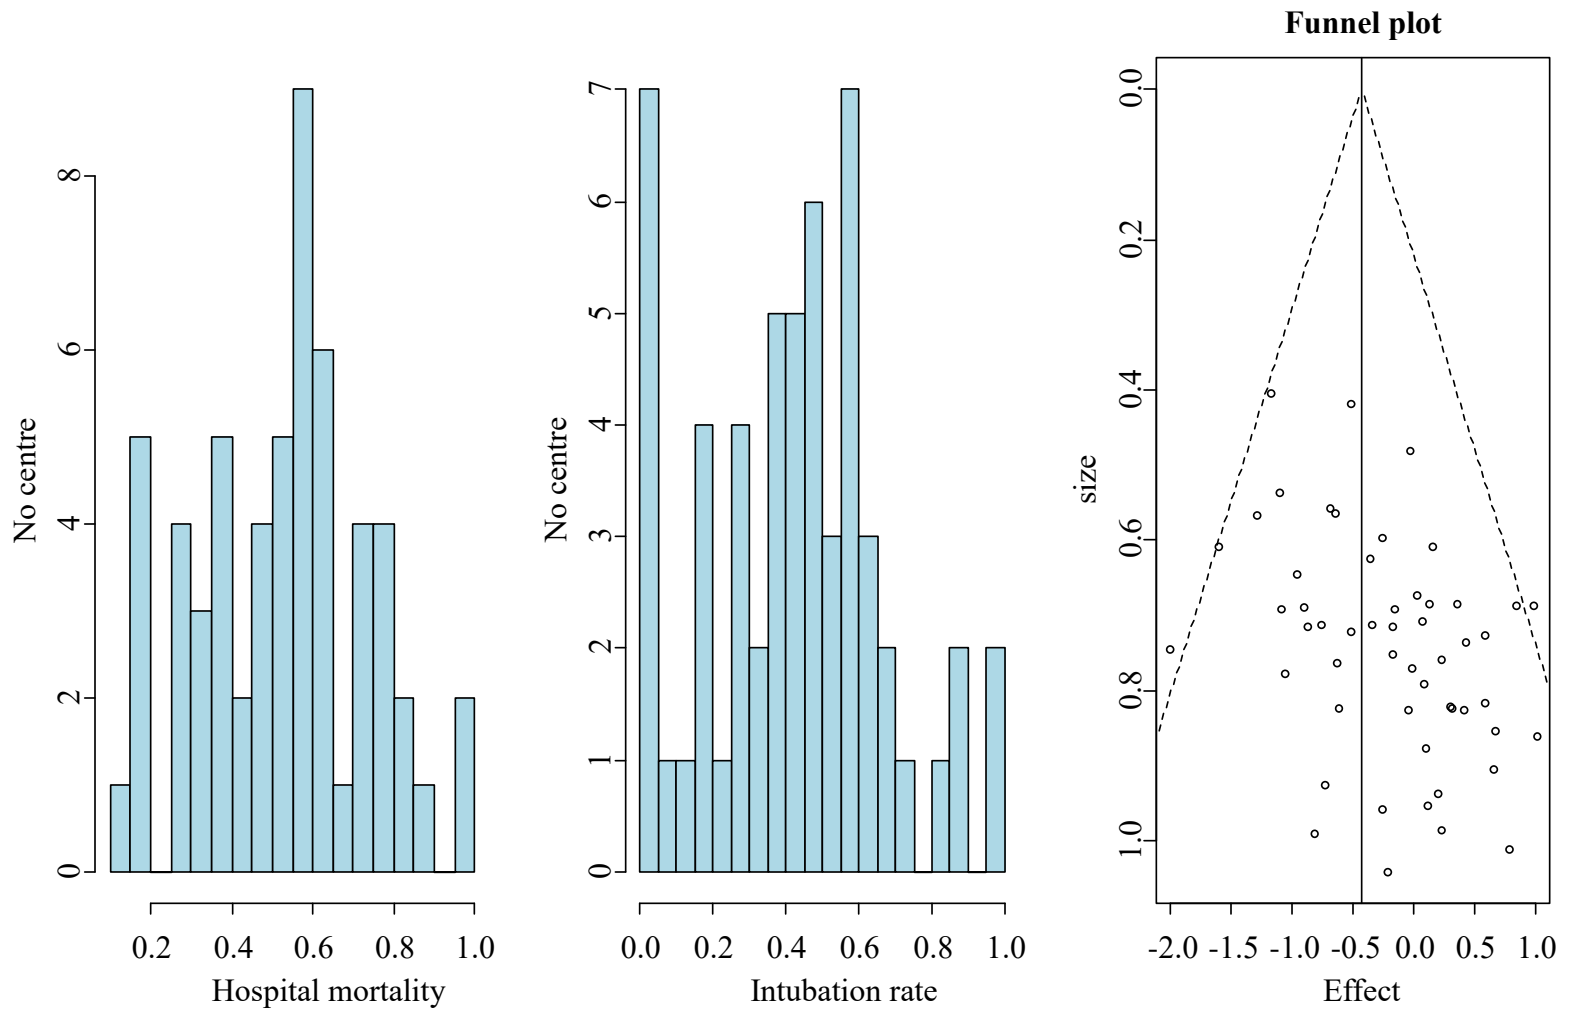

Table S1: Detailed immunosuppression according to diagnostic group (NIT: non-invasive testing only; NIT-FOB: non-invasive testing coupled with bronchoscopy; data, as available, are presented as N, percentage, or median [interquartile range])

|                                          |                              | <b>NIT-FOB<br/>(N=618)</b> |              | <b>NIT<br/>(N=969)</b> |              |         |
|------------------------------------------|------------------------------|----------------------------|--------------|------------------------|--------------|---------|
| Characteristics                          | Values                       | N                          | Statistics   | N                      | Statistics   | P value |
| Duration of disease                      | Days                         | 344                        | 166 [21;593] | 595                    | 113 [11;728] | 0.34    |
| Hematologic malignancy                   | Any                          | 346                        | 56.0%        | 482                    | 49.7%        | 0.017   |
| Acute myeloid leukaemia                  |                              | 84                         | 13.6%        | 124                    | 12.8%        |         |
| Acute lymphoblastic leukaemia            |                              | 21                         | 3.4%         | 30                     | 3.1%         |         |
| Non Hodgkin lymphoma                     |                              | 69                         | 11.2%        | 110                    | 11.4%        |         |
| Myeloma                                  |                              | 73                         | 11.8%        | 74                     | 7.6%         |         |
| Hodgkin lymphoma                         |                              | 17                         | 2.8%         | 19                     | 2.0%         |         |
| Chronic lymphocytic leukaemia            |                              | 15                         | 2.4%         | 36                     | 3.7%         |         |
| Chronic myeloid leukaemia                |                              | 11                         | 1.8%         | 18                     | 1.9%         |         |
| Other                                    |                              | 56                         | 9.1%         | 71                     | 7.3%         |         |
| Disease stage status                     | New diagnosis                | 115                        | 26.1%        | 213                    | 31.8%        | 0.003   |
|                                          | 1 <sup>st</sup> line therapy | 73                         | 16.6%        | 109                    | 16.3%        |         |
|                                          | > 1 <sup>st</sup> line       | 110                        | 25.0%        | 152                    | 22.7%        |         |
|                                          | Remission                    | 71                         | 16.1%        | 98                     | 14.6%        |         |
|                                          | Uncontrolled                 | 67                         | 15.2%        | 71                     | 10.6%        |         |
|                                          | Palliative                   | 4                          | 0.9%         | 27                     | 4.0%         |         |
| Haematopoietic stem cell transplantation | Autologous                   | 44                         | 7.1%         | 56                     | 5.8%         | <0.0001 |
|                                          | Allogeneic                   | 82                         | 13.3%        | 69                     | 7.1%         |         |
| Systemic disease                         |                              | 124                        | 20.1%        | 153                    | 15.8%        | 0.034   |
| Solid organ tumour                       |                              | 168                        | 27.2%        | 382                    | 39.4%        | <0.0001 |
| Solid organ transplant                   |                              | 78                         | 14.1%        | 63                     | 7.3%         | <0.0001 |
| Corticosteroid use                       |                              | 495                        | 0 [0;22]     | 802                    | 0 [0;15]     | 0.006   |
| Neutropenia                              |                              | 95                         | 16.4%        | 154                    | 16.4%        | 1.00    |

Table S2: Comorbidities according to diagnostic group

|                         |               | <b>NIT-FOB<br/>(N=618)</b> |                   | <b>NIT<br/>(N 969)</b> |                   |                |
|-------------------------|---------------|----------------------------|-------------------|------------------------|-------------------|----------------|
| <b>Characteristics</b>  | <b>Values</b> | <b>N</b>                   | <b>Statistics</b> | <b>N</b>               | <b>Statistics</b> | <b>P value</b> |
| Cardiac disease         |               | 122                        | 20.9%             | 215                    | 23.9%             | 0.19           |
| Tobacco use             |               | 168                        | 28.8%             | 287                    | 31.0%             | 0.40           |
| COPD                    |               | 70                         | 11.7%             | 177                    | 18.8%             | 0.0003         |
| Diabetes mellitus       |               | 113                        | 18.9%             | 188                    | 20.0%             | 0.66           |
| Chronic kidney disease  |               | 91                         | 15.1%             | 139                    | 14.7%             | 0.88           |
| Haemodialysis           |               | 15                         | 2.5%              | 27                     | 2.9%              | 0.76           |
| Cirrhosis               |               | 28                         | 4.7%              | 29                     | 3.1%              | 0.13           |
| Alcohol use             |               | 54                         | 9.1%              | 93                     | 10.0%             | 0.64           |
| ECOG performance status | 0             | 148                        | 28.8%             | 161                    | 20.9%             | 0.005          |
|                         | 1             | 157                        | 30.5%             | 259                    | 33.6%             |                |
|                         | 2             | 123                        | 23.9%             | 183                    | 23.8%             |                |
|                         | 3             | 86                         | 16.7%             | 167                    | 21.7%             |                |
| Immunization            |               | 64                         | 13.5%             | 76                     | 10.7%             | 0.18           |

ECOG: Eastern Cooperative Oncology Group

Table S3: Sequential organ failure assessment (SOFA) score according to diagnostic group

|                         |               | <b>NIT-FOB<br/>N=618)</b> |                   | <b>NIT<br/>(N=969)</b> |                   |                |
|-------------------------|---------------|---------------------------|-------------------|------------------------|-------------------|----------------|
| <b>Characteristics</b>  | <b>Values</b> | <b>N</b>                  | <b>Statistics</b> | <b>N</b>               | <b>Statistics</b> | <b>P value</b> |
| SOFA score on admission |               | 615                       | 8 [4;10.5]        | 960                    | 7 [4;10]          | 0.0009         |
| Respiratory SOFA        | 0             | 47                        | 7.9%              | 154                    | 16.4%             | <0.0001        |
|                         | 1             | 33                        | 5.5%              | 120                    | 12.8%             |                |
|                         | 2             | 163                       | 27.2%             | 298                    | 31.7%             |                |
|                         | 3             | 200                       | 33.4%             | 227                    | 24.1%             |                |
|                         | 4             | 156                       | 26.0%             | 142                    | 15.1%             |                |
| Cardiovascular SOFA     | 0             | 272                       | 44.4%             | 444                    | 46.3%             | 0.52           |
|                         | 1             | 101                       | 16.5%             | 172                    | 17.9%             |                |
|                         | 2             | 10                        | 1.6%              | 22                     | 2.3%              |                |
|                         | 3             | 56                        | 9.1%              | 77                     | 8.0%              |                |
|                         | 4             | 174                       | 28.4%             | 245                    | 25.5%             |                |
| Hepatic SOFA            | 0             | 435                       | 71.2%             | 673                    | 70.3%             | 0.93           |
|                         | 1             | 83                        | 13.6%             | 139                    | 14.5%             |                |
|                         | 2             | 61                        | 10.0%             | 98                     | 10.2%             |                |
|                         | 3             | 16                        | 2.6%              | 28                     | 2.9%              |                |
|                         | 4             | 16                        | 2.6%              | 20                     | 2.1%              |                |
| Hematologic SOFA        | 0             | 252                       | 41.2%             | 472                    | 49.4%             | 0.016          |
|                         | 1             | 88                        | 14.4%             | 105                    | 11.0%             |                |
|                         | 2             | 83                        | 13.6%             | 125                    | 13.1%             |                |
|                         | 3             | 97                        | 15.9%             | 120                    | 12.6%             |                |
|                         | 4             | 92                        | 15.0%             | 134                    | 14.0%             |                |
| Neurological SOFA       | 0             | 383                       | 64.2%             | 610                    | 65.0%             | 0.049          |
|                         | 1             | 105                       | 17.6%             | 151                    | 16.1%             |                |
|                         | 2             | 31                        | 5.2%              | 63                     | 6.7%              |                |
|                         | 3             | 24                        | 4.0%              | 58                     | 6.2%              |                |
|                         | 4             | 54                        | 9.1%              | 57                     | 6.1%              |                |
| Renal SOFA              | 0             | 356                       | 58.4%             | 504                    | 52.8%             | 0.12           |
|                         | 1             | 116                       | 19.0%             | 188                    | 19.7%             |                |
|                         | 2             | 69                        | 11.3%             | 122                    | 12.8%             |                |
|                         | 3             | 35                        | 5.7%              | 59                     | 6.2%              |                |
|                         | 4             | 34                        | 5.6%              | 81                     | 8.5%              |                |

Table S4: Clinical data according to diagnostic group (NIT: non-invasive testing only; NIT-FOB: non-invasive testing coupled with bronchoscopy; data, as available, are presented as N, percentage, or median [interquartile range])

|                                             |               | <b>NIT-FOB<br/>(N=618)</b> |                   | <b>NIT<br/>(N=969)</b> |                   |                |
|---------------------------------------------|---------------|----------------------------|-------------------|------------------------|-------------------|----------------|
| <b>Characteristics</b>                      | <b>Values</b> | <b>N</b>                   | <b>Statistics</b> | <b>N</b>               | <b>Statistics</b> | <b>P value</b> |
| Temperature                                 | °C            | 609                        | 37.9 [36.7;38.9]  | 953                    | 37.7 [36.5;38.6]  | 0.017          |
| Respiratory rate                            | breath/minute | 585                        | 32 [25;38]        | 922                    | 30 [25;36]        | 0.005          |
| SpO <sub>2</sub>                            | %             | 604                        | 91 [87;95]        | 947                    | 92 [88;95]        | 0.016          |
| PaO <sub>2</sub>                            | mm Hg         | 538                        | 68 [58;83]        | 771                    | 73 [60;89]        | 0.002          |
| PaCO <sub>2</sub>                           | mm Hg         | 536                        | 39 [31;50]        | 761                    | 36 [29;47]        | 0.0009         |
| FiO <sub>2</sub>                            | %             | 222                        | 50 [50;83.75]     | 279                    | 50 [40;70]        | 0.0003         |
| O <sub>2</sub> flow                         | L/min         | 232                        | 10 [5;15]         | 469                    | 6 [3;15]          | <0.0001        |
| PaO <sub>2</sub> /FiO <sub>2</sub> on Day 1 |               | 618                        | 140 [95;173]      | 969                    | 173 [125;219]     | <0.0001        |
| ≥300                                        |               | 42                         | 6.8%              | 93                     | 9.6%              |                |
| 200-299                                     |               | 98                         | 15.9%             | 146                    | 15.1%             |                |
| 100-199                                     |               | 389                        | 62.9%             | 674                    | 69.6%             |                |
| < 100                                       |               | 89                         | 14.4%             | 56                     | 5.8%              |                |
| Chest pain                                  |               | 62                         | 11.0%             | 111                    | 12.3%             | 0.50           |
| Cough                                       |               | 277                        | 49.4%             | 357                    | 39.6%             | 0.0003         |
| Purulent sputum                             |               | 139                        | 24.2%             | 167                    | 18.4%             | 0.008          |
| Haemoptysis                                 |               | 53                         | 9.2%              | 37                     | 4.1%              | <0.0001        |
| Muscle pain                                 |               | 37                         | 6.5%              | 54                     | 6.0%              | 0.77           |
| Conjunctivitis                              |               | 4                          | 0.7%              | 4                      | 0.4%              | 0.76           |
| Rhinorrhoea                                 |               | 15                         | 2.6%              | 21                     | 2.3%              | 0.85           |
| Skin rash                                   |               | 36                         | 6.3%              | 46                     | 5.0%              | 0.38           |
| Leucocyte count                             | x10(9)/L      | 580                        | 9 [3;16]          | 937                    | 10 [3;17]         | 0.29           |
| Neutrophil count                            | x10(9)/L      | 440                        | 9 [2;23.5]        | 662                    | 9 [3;20]          | 0.83           |
| Platelet count                              | x10(9)/L      | 605                        | 118 [37;223]      | 943                    | 136 [41;241]      | 0.12           |
| Bronchoscopy prior to ICU                   |               | 98                         | 16.6%             | 32                     | 3.6%              | <0.0001        |

Table S5: Laboratory data according to diagnostic group

|                                             |               | <b>NIT-FOB<br/>(N=618)</b> |                   | <b>NIT<br/>(N=969)</b> |                   |                |
|---------------------------------------------|---------------|----------------------------|-------------------|------------------------|-------------------|----------------|
| <b>Characteristics</b>                      | <b>Values</b> | <b>N</b>                   | <b>Statistics</b> | <b>N</b>               | <b>Statistics</b> | <b>P value</b> |
| <i>Blood culture</i>                        | Tested        | 582                        | 94.3%             | 852                    | 88.5%             | 0.0001         |
| Blood culture                               | Positive      | 119                        | 22.0%             | 223                    | 28.7%             | 0.008          |
| <i>Sputum</i>                               | Tested        | 356                        | 57.6%             | 436                    | 44.9%             | <0.0001        |
| Sputum                                      | Positive      | 133                        | 38.8%             | 185                    | 45.0%             | 0.098          |
| <i>Induced Sputum</i>                       | Tested        | 183                        | 31.1%             | 118                    | 12.4%             | <0.0001        |
| Induced sputum                              | Positive      | 27                         | 14.5 %            | 19                     | 15.3 %            | 0.97           |
| <i>Nasopharyngeal aspirate</i>              | Tested        | 280                        | 46.7 %            | 312                    | 32.8 %            | <0.0001        |
| Nasopharyngeal aspirate                     | Positive      | 85                         | 32.0 %            | 106                    | 36.1 %            | 0.35           |
| <i>Thoracentesis</i>                        | Tested        | 71                         | 12.0 %            | 104                    | 11.0 %            | 0.60           |
| Thoracentesis                               | Positive      | 14                         | 18.4 %            | 27                     | 24.3 %            | 0.44           |
| <i>Biomarkers (BNP, PCT, CRP...), any</i>   | Tested        | 479                        | 80.5 %            | 691                    | 72.9 %            | 0.0008         |
| Biomarkers                                  | Abnormal      | 298                        | 83.9 %            | 440                    | 84.9 %            | 0.76           |
| <i>Urine antigen</i>                        | Tested        | 372                        | 62.3 %            | 395                    | 41.7 %            | <0.0001        |
| Urine antigen                               | Positive      | 17                         | 4.7 %             | 38                     | 10.1 %            | 0.009          |
| <i>Serum galactomannan (or □□-D-glucan)</i> | Tested        | 292                        | 50.5 %            | 210                    | 22.5 %            | <0.0001        |
| Serum galactomannan (or b-D-glucan)         | Positive      | 47                         | 17.0 %            | 22                     | 10.6 %            | 0.065          |
| <i>PCR for herpes, CMV or other</i>         | Tested        | 423                        | 73.1 %            | 347                    | 38.4 %            | <0.0001        |
| PCR for herpes, CMV or other                | Positive      | 153                        | 38.7 %            | 110                    | 33.6 %            | 0.18           |
| <i>Lung US, echocardiography, any</i>       | Tested        | 339                        | 66.9 %            | 469                    | 53.7 %            | <0.0001        |
| Lung US, echocardiography, any              | Abnormal      | 74                         | 26.6 %            | 164                    | 41.5 %            | <0.0001        |
| CRP on day 1                                | mg/L          | 276                        | 118 [28;196.2]    | 421                    | 77 [33;163]       | 0.020          |
| CRP on day 2                                | mg/L          | 223                        | 120 [37.5;206]    | 285                    | 90 [35;181]       | 0.032          |
| CRP on day 3                                | mg/L          | 198                        | 109.5 [30;204]    | 255                    | 79 [30;177.5]     | 0.086          |

BNP: brain natriuretic peptide; PCT: procalcitonin; CRP: C-reactive protein; PCR: polymerase chain reaction; CMV: cytomegalovirus; US: ultrasound



Table S6: Aetiologies according to diagnostic group; primary diagnosis refers as the main diagnosis considered by the clinician and secondary diagnosis refers to others associated with it

|                                  | <b>NIT-FOB<br/>(N=618)</b> |              | <b>NIT<br/>(N=969)</b> |              |
|----------------------------------|----------------------------|--------------|------------------------|--------------|
| <b>Diagnosis</b>                 | <b>N</b>                   | <b>%</b>     | <b>N</b>               | <b>%</b>     |
| <b>Primary Diagnosis</b>         | <b>618</b>                 | <b>100</b>   | <b>969</b>             | <b>100</b>   |
| Adenovirus                       | 0                          | 0            | 2                      | 0.21         |
| Airway issue                     | 21                         | 3.4          | 30                     | 3.1          |
| Aspiration                       | 18                         | 2.91         | 51                     | 5.26         |
| Bacterial infection              | 165                        | 26.7         | 264                    | 27.24        |
| Tuberculosis                     | 2                          | 0.32         | 0                      | 0            |
| Candidemia                       | 16                         | 2.59         | 17                     | 1.75         |
| Cytomegalovirus                  | 8                          | 1.29         | 4                      | 0.41         |
| Chronic obstructive lung disease | 3                          | 0.49         | 18                     | 1.86         |
| Coronavirus                      | 4                          | 0.65         | 2                      | 0.21         |
| Drug toxicity                    | 18                         | 2.91         | 21                     | 2.17         |
| Enterovirus                      | 1                          | 0.16         | 0                      | 0            |
| Extra-pulmonary causes           | 30                         | 4.85         | 125                    | 12.9         |
| Herpes simplex virus             | 1                          | 0.16         | 0                      | 0            |
| Infiltrative process             | 62                         | 10.03        | 68                     | 7.02         |
| Influenza                        | 67                         | 10.84        | 54                     | 5.57         |
| Invasive pulmonary aspergillosis | 20                         | 3.24         | 15                     | 1.55         |
| Metapneumovirus                  | 4                          | 0.65         | 2                      | 0.21         |
| Mucor                            | 0                          | 0            | 1                      | 0.1          |
| Neutrophilic recovery            | 0                          | 0            | 1                      | 0.1          |
| Pulmonary edema, acute           | 19                         | 3.07         | 80                     | 8.26         |
| Pneumocystis jirovecii           | 41                         | 6.63         | 18                     | 1.86         |
| Pulmonary embolism               | 2                          | 0.32         | 17                     | 1.75         |
| Parainfluenza virus 3            | 1                          | 0.16         | 5                      | 0.52         |
| Pleural effusion                 | 3                          | 0.49         | 40                     | 4.13         |
| Respiratory syncytial virus      | 15                         | 2.43         | 10                     | 1.03         |
| Rhinovirus                       | 9                          | 1.46         | 0                      | 0            |
| Trichosporon                     | 3                          | 0.49         | 0                      | 0            |
| Unknown                          | 85                         | 13.75        | 124                    | 12.8         |
| <b>Secondary diagnosis</b>       | <b>499</b>                 | <b>80.88</b> | <b>847</b>             | <b>87.41</b> |
| Adenovirus                       | 2                          | 0.32         | 2                      | 0.21         |
| Airway issue                     | 0                          | 0            | 1                      | 0.1          |
| Aspiration                       | 0                          | 0            | 2                      | 0.21         |
| Bacterial infection              | 15                         | 2.43         | 26                     | 2.68         |

|                                  |    |      |    |      |
|----------------------------------|----|------|----|------|
| Candidemia                       | 2  | 0.32 | 2  | 0.21 |
| Cytomegalovirus                  | 2  | 0.32 | 0  | 0    |
| Drug toxicity                    | 6  | 0.97 | 7  | 0.72 |
| Enterovirus                      | 0  | 0    | 1  | 0.1  |
| Fusarium                         | 1  | 0.16 | 0  | 0    |
| Infiltrative process             | 3  | 0.49 | 13 | 1.34 |
| Influenza                        | 19 | 3.08 | 13 | 1.34 |
| Invasive fungal infection        | 9  | 1.46 | 10 | 1.03 |
| Invasive pulmonary aspergillosis | 26 | 4.21 | 3  | 0.31 |
| Metapneumovirus                  | 1  | 0.16 | 0  | 0    |
| Mucor                            | 2  | 0.32 | 0  | 0    |
| Acute pulmonary oedema           | 3  | 0.49 | 2  | 0.21 |
| Pneumocystis jirovecii           | 7  | 1.13 | 3  | 0.31 |
| Pulmonary embolism               | 1  | 0.16 | 5  | 0.52 |
| Parainfluenza virus 3            | 4  | 0.65 | 4  | 0.41 |
| Pleural effusion                 | 8  | 1.3  | 16 | 1.65 |
| Reconstitution syndrome          | 0  | 0    | 1  | 0.1  |
| Respiratory syncytial virus      | 5  | 0.81 | 6  | 0.62 |
| Rhinovirus                       | 2  | 0.32 | 5  | 0.52 |
| Unknown                          | 1  | 0.16 | 0  | 0    |

Table S7: Bronchoscopy procedural details and outcomes (data are presented as N, percentage)

| <b>Characteristics</b>                                    | <b>Bronchoscopy<br/>(N=618)</b> |               |                |
|-----------------------------------------------------------|---------------------------------|---------------|----------------|
|                                                           | <b>Present</b>                  | <b>Absent</b> | <b>Unknown</b> |
| Respiratory support during bronchoscopy                   | 509 (82%)                       |               | 109 (18%)      |
| Standard oxygen at the time of bronchoscopy               | 80 (13%)                        | -             |                |
| High flow nasal cannula at the time of bronchoscopy       | 23 (4%)                         | -             |                |
| Non-invasive ventilation at the time of bronchoscopy      | 27 (4%)                         | -             |                |
| Intubation at the time of bronchoscopy                    | 379 (61%)                       | -             |                |
| Diagnosis obtained by bronchoscopy                        | 300 (49%)                       | 99 (16%)      | 219 (35%)      |
| Abnormal bronchial examination                            | 210 (34%)                       | 252 (41%)     | 156 (25%)      |
| Protected bacterial distal sampling                       | 84 (14%)                        | 534 (86%)     | -              |
| Biopsies (bronchial or trans bronchial)                   | 33 (5%)                         | 507 (82%)     | 78 (13%)       |
| Bronchoalveolar lavage the first line diagnostic strategy | 279 (45%)                       | 278 (45%)     | 61 (10%)       |
| Bronchoscopy performed by external consultant             | 208 (34%)                       | 340 (55%)     | 70 (11%)       |
| Findings identified by another test                       | 135 (22%)                       | 377 (61%)     | 106 (17%)      |
| Bronchoscopy induced change in management                 | 236 (38%)                       | 148 (24%)     | 234 (38%)      |
| Positive test prompted new therapy                        | 76 (12%)                        | -             | -              |
| Negative test allowed drug withdrawal                     | 160 (26%)                       | -             | -              |
| Respiratory status worsened after bronchoscopy            | 70 (11%)                        | 322 (52%)     | 226 (37%)      |

Table S8: Potential confounders of in-hospital mortality, within the first day of ICU admission, according to diagnostic group (ECOG: Eastern Cooperative Oncology Group; data are presented as N, percentage, or median [interquartile range])

|                                             |               | <b>NIT-FOB<br/>(N=618)</b> |                   | <b>NIT<br/>(N=969)</b> |                   |                |
|---------------------------------------------|---------------|----------------------------|-------------------|------------------------|-------------------|----------------|
| <b>Characteristics</b>                      | <b>Values</b> | <b>N</b>                   | <b>Statistics</b> | <b>N</b>               | <b>Statistics</b> | <b>P value</b> |
| Age                                         | Years         | 587                        | 62.3 [53.3;69.9]  | 927                    | 64.7 [55.2;72.4]  | 0.0009         |
| Duration of symptoms                        | Days          | 586                        | 2 [0;6]           | 936                    | 1 [0;3]           | <0.0001        |
| Same day ICU admission                      |               | 160                        | 26.4%             | 355                    | 37.0 %            | <0.0001        |
| Hematologic malignancy                      |               | 346                        | 56.0%             | 482                    | 49.7%             | 0.017          |
| Solid organ tumour                          |               | 168                        | 27.2%             | 382                    | 39.4%             | <0.0001        |
| Solid organ transplant                      |               | 78                         | 14.1%             | 63                     | 7.3%              | <0.0001        |
| Hematopoietic stem cell transplantation     | Autologous    | 44                         | 7.1%              | 56                     | 5.8%              | <0.0001        |
|                                             | Allogeneic    | 82                         | 13.3%             | 69                     | 7.1%              |                |
| COPD                                        |               | 70                         | 11.7%             | 177                    | 18.8%             | 0.0003         |
| ECOG performance status                     | 0             | 148                        | 28.8%             | 161                    | 20.9%             | 0.005          |
|                                             | 1             | 157                        | 30.5%             | 259                    | 33.6%             |                |
|                                             | 2             | 123                        | 23.9%             | 183                    | 23.8%             |                |
|                                             | 3             | 86                         | 16.7%             | 167                    | 21.7%             |                |
|                                             | 4             | 156                        | 26.0%             | 142                    | 15.1%             |                |
| Respiratory SOFA                            | 0             | 47                         | 7.9%              | 154                    | 16.4%             | <0.0001        |
|                                             | 1             | 33                         | 5.5%              | 120                    | 12.8%             |                |
|                                             | 2             | 163                        | 27.2%             | 298                    | 31.7%             |                |
|                                             | 3             | 200                        | 33.4%             | 227                    | 24.1%             |                |
|                                             | 4             | 156                        | 26.0%             | 142                    | 15.1%             |                |
| SOFA score on admission                     |               | 615                        | 8 [4;10.5]        | 960                    | 7 [4;10]          | 0.0009         |
| Cough                                       |               | 277                        | 49.4%             | 357                    | 39.6%             | 0.0003         |
| Haemoptysis                                 |               | 53                         | 9.2%              | 37                     | 4.1%              | <0.0001        |
| PaO <sub>2</sub> /FiO <sub>2</sub> on day 1 |               | 618                        | 140 [95;173]      | 969                    | 173 [125;219]     | <0.0001        |

Table S9: Standardized mean difference (SMD) according to the diagnostic group (results are expressed as mean (SD) or n (%) as appropriate)

|                                             |               | <b>NIT-FOB<br/>(N=618)</b> | <b>NIT<br/>(N=969)</b> | <b>SMD</b>        |
|---------------------------------------------|---------------|----------------------------|------------------------|-------------------|
| <b>Characteristics</b>                      | <b>Values</b> | <b>Statistics</b>          | <b>Statistics</b>      | <b>Statistics</b> |
| Age                                         | Years         | 60.01 (14.67)              | 62.24 (15.22)          | 0.149             |
| Duration of symptoms                        | Days          | 5.06 (12.74)               | 2.82 (13.02)           | 0.174             |
| Same day ICU admission,                     | Units         | 0.26 (0.44)                | 0.37 (0.48)            | 0.230             |
| Hematologic malignancy                      | Units         | 0.56 (0.50)                | 0.50 (0.50)            | 0.125             |
| Solid organ tumour                          | Units         | 0.27 (0.45)                | 0.39 (0.49)            | 0.262             |
| Solid organ transplant                      | Units         | 0.14 (0.35)                | 0.07 (0.26)            | 0.222             |
| Hematopoietic stem cell transplantation     |               |                            |                        | 0.217             |
| None                                        | Units         | 492 (79.6)                 | 844 (87.1)             |                   |
| Autologous                                  | Units         | 44 ( 7.1)                  | 56 ( 5.8)              |                   |
| Allogeneic                                  | Units         | 82 (13.3)                  | 69 ( 7.1)              |                   |
| COPD                                        | Units         | 0.12 (0.32)                | 0.19 (0.39)            | 0.197             |
| ECOG performance status                     | Units         | 1.29 (1.06)                | 1.46 (1.05)            | 0.167             |
| Respiratory SOFA                            | Units         | 2.64 (1.15)                | 2.09 (1.27)            | 0.456             |
| SOFA score on admission                     | Units         | 7.72 (4.13)                | 7.04 (4.17)            | 0.165             |
| Cough                                       | Units         | 0.49 (0.50)                | 0.40 (0.49)            | 0.198             |
| Haemoptysis                                 | Units         | 0.09 (0.29)                | 0.04 (0.20)            | 0.207             |
| PaO <sub>2</sub> /FiO <sub>2</sub> on day 1 | Units         | 152.0 (76.68)              | 185.8 (90.00)          | 0.404             |
